# Supplementary material for: Bridging past and present: exploring Cannabis traditions in Armenia through ethnobotanical interviews and bibliographic prospecting
Source: J Cannabis Res. 2025 Jan 30;7:8. doi: 10.1186/s42238-025-00259-x (PMC11780856; doi:10.1186/s42238-025-00259-x)
Supplement: Supplementary file 2 — Supplementary Material 2. [file 42238_2025_259_MOESM2_ESM.xlsx]

## Sheet: SP_2
Supplementary material 2: The table contains the anonymized raw data obtained during the interviews. The first part includes information regarding sociodemographic characteristics of the informants, and the second prt is focused on the Cannabis traditional use. Each row reperesents one informant.
Interview ID	Locality	Date	Interview and informant language	Interpreter	Sex	Birth year	Common name	Medicinal use	Used part	Use	Preparation	Route of adminstraton	Destination	Food use	Used part	Use	Preparation	Destination	Other uses	Used part	Use	Preparation	Is hemp smoked in your territory?	With what objective?	Sacred or venerated	Ritual use	Used part	Use	Preparation	Saying or song	Observations	Game	Observation	Seeds obtaintion	Since when are you cultivating the same seeds?	Male and female distintion	Is all the hemp you know cultivated?	Agricultural practices	When are the seeds sown?	When are the plants harvested?	Did you use wild hemp?	Where do you collect it?	Do you know where the plant grows wild?	Do you distinguish different types of hemp?	Do you perform any crossing?	Since when do you know the plant?	Who explained you its uses?	Other informations
1	Gegharkuniq marz, v. Lichq	2018.09.20	Armenian	NO	Male	1949	Kanep	NO	_	_	_	_	_	YES	Seeds	Tolma	Extract the oil from the seeds. That oil people used to add to the Tolma instead of the butter. But that was in the past, now breeding the hemp is forbidden	Human	NO	_	_	_	NO	_	NO	NO	_	_	_	NO	_	NO	_	_	_	The male plants matured earlier	NO	NO	_	_	NO	_	NO	_	NO	Childhood	Parents, neighbors	Now breeding the hemp is forbidden
2	Gegharkuniq marz, v. Karchaghbyur	2018.09.20	Armenian	NO	Female	1953	Kanep	NO	_	_	_	_	_	YES	Seeds	Tolma with wheat (“dzavar”)	The seeds of hemp 3 times mince with manual mincing machine. For that porpose in the old times stones were used. After that riddle through the coarse sieve to separate the husk. Add warm water and dissolve the riddled seeds. That mixture is looked like oil. Prepare the dish called Dzavarov tolma (Tolma with wheat instead of meat). Add the oil from the Cannabis to the Tolma instead of butter	Human	NO	_	_	_	NO	_	NO	YES	Seeds	Aghandz	Օn the frying pan mix with seeds of wheat and salt dissolved in water. For everyday use. Also that dish prepared for the fest called «Trndez» (Fest of Fire, Sun which usually celebrated in February). For the fest called “Atamhatik” (Baby's first tooth) add to that mixture the sweets. For that purpose use colorfully candies and other sweets. During the ceremony of “Atamhatik” this mixture relative…	NO	_	NO	_	_	_	The male plants has no fruits	NO	In the old times it cultivated much more and was traditional crop.	_	_	NO	_	YES	It's basically grows in the potato field as a weed. People let it grow in the 4 ankle of the field.	NO	Childhood	Relatives of the husband, neighbors	_
3.1	Gegharkuniq marz, v. Tsovinar	2018.09.20	Armenian	NO	Female	1969	Kanep	NO	_	_	_	_	_	YES	Seeds	Tolma with wheat (“dzavar”)	The seeds of Cannabis put in blender. For mince in old times were used the stones. Riddle through the coarse sieve to separate the husk. Dissolve in the warm water to make oil like mixture. Prepare Dzavarov tolma (Tolma with wheat instead of meat). Add the oil from the hemp to the Tolma	Human	NO	_	_	_	NO	_	NO	YES	Seeds	Aghandz	Օn the frying pan mix with seeds of wheat, add salt dissolved in water. That dish prepared especially for the fest called «Trndez»	NO	_	NO	_	_	_	The male plants have matured earlier and have no fruits	NO	NO	_	_	NO	_	YES	It's grows in the potato field as a weed. Usually grows on the edge of the field.	NO	Childhood	Parents, neighbors	_
3.2	Gegharkuniq marz, v. Tsovinar	2018.09.20	Armenian	NO	Male	1929	Kanep	NO	_	_	_	_	_	YES	Seeds	Tolma with wheat (“dzavar”)	The seeds of hemp mince, add the oil from hemp to the Tolma	Human	NO	_	_	_	NO	_	NO	YES	Seeds	Aghandz	Mix with seeds of wheat, salt. That dish prepared for the fest called «Trndez» and for «Atamhatik» (fest of the first tооth). Tolma is usually prepared in winter, especially for the New Year	NO	_	NO	_	_	_	The male plants have matured earlier	NO	NO	_	_	YES	From the potato field	YES	Hemp grows in the potato field as a weed.	NO	Childhood	Relatives, neighbors	_
4	Lori marz, near town Vanadzor	2018.09.21	Armenian	NO	Male	1988	Kanep	NO	_	_	_	_	_	NO	_	_	_	_	NO	_	_	_	YES	Don't know	NO	NO	_	_	_	NO	_	NO	_	_	_	_	NO	NO	_	_	NO	_	NO	_	NO	Don’t remember	_	This plant is fobidden
5	Lori marz, near town Vanadzor	2018.09.21	Armenian	NO	Female	1945	Kanep	YES	Seeds	Her mother about 40 years ago bought the seeds of hemp from market and prepared for her to have more breast milk	Roasing on the frying pan	Eating the seeds	Human	YES	Seeds	Aghandz	Mixing with seeds of wheat, roasting on the frying pan, add salt dissolved in water, continue roasting	Human	NO	_	_	_	YES	Don't know, never was interested in that subject	NO	YES	Seeds	Aghandz	Seeds of Kanep mixing on the frying pan with seeds of wheat and small quantity of salt dissolved in water. Add small colorfully candies. During the ceremony of Baby's first tooth (“Atamhatik”) this mixture relatives sprinkle on the head of the baby (covered with serviette) as a sign of the future wealthy, rich and «sweet» life of the baby	NO	_	NO	_	_	_	_	YES	NO	_	_	NO	_	NO	_	NO	Childhood	Have seen how relatives and neighbors use it	_
6.1	Lori marz, v. Gargar	2018.09.21	Armenian	NO	Female	1975	Kanep	NO	_	_	_	_	_	YES	Seeds	Aghandz	Mixing with seeds of wheat, roasting on the frying pan, add salt dissolved in water, continue roasting	Human	YES	Probably stems	Hempstring	Doesn't know because that was in old times, but they have and still use that rope	YES	Don't know, never was interested for the subject	NO	YES	Seeds	Aghandz	Mixing on the frying pan with seeds of wheat and salt dissolved in water. Add small colorfully candies and other sweets. During the ceremony of Baby's first tooth (“Atamhatik”) this mixture relatives sprinkle on the head of the baby (covered with napkin) as a sign of his future wealthy, rich and «sweet» life	NO	_	NO	_	_	_	_	NO	NO	_	_	NO	_	NO	_	NO	Childhood	Have seen how relatives and neighbors use it	_
6.2	Lori marz, v. Gargar	2018.09.21	Armenian	NO	Male	1966	Kanep	NO	_	_	_	_	_	YES	Seeds	Aghandz	Don’t know the way of preparation because usually women have deal with it	Human	YES	Stems	Hempstring	Doesn't know, that was in the past	YES	Don't know, never have used. Have heard about it in past	NO	YES	Seeds	Aghandz	During the ceremony of Baby's first tooth relatives sprinkle aghandz on the head of the baby as a sign of his wealthy	NO	_	NO	_	_	_	The mail plants matured earlier	NO	NO	_	_	NO	_	YES	The wild or wildish hemp grows in the potato field. There isn't watering potatoes' field. But the soil is good, and hemp grows very good as a weed.	NO	Childhood	Have seen how relatives use it	_
7	Lori marz, near v. Dzoraget	2018.09.21	Armenian	NO	Female	1934	Kanep	NO	_	_	_	_	_	YES	Seeds	Aghandz	Mixing with seeds of wheat, roasting on the frying pan, add salt dissolved in water, continue roasting	Human	NO	_	_	_	NO	_	NO	YES	Seeds	Aghandz	On the frying pan mixing with seeds of wheat and small quantity of salt dissolved in water. Add small colorfully candies, raisins. During the ceremony of Baby's first tooth (“Atamhatik”) relatives sprinkle on the head of the baby as a sign of his future wealthy, rich and «sweet» life	NO	_	NO	_	_	_	_	NO	NO	_	_	NO	_	NO	_	NO	Childhood	Parents	_
8.1	Tavush marz, near town Dilijan	2018.09.22	Armenian	NO	Female	1947	Kanep	NO	_	_	_	_	_	YES	Seeds	Aghandz	Mixing with seeds of wheat, roasting on the frying pan, add salt	Human	NO	_	_	_	NO	_	NO	YES	Seeds	Aghandz	Mixing on the frying pan with seeds of wheat and salt. Add small colorfully candies, other sweets. During the ceremony of Baby's first tooth (“Atamhatik”) this mixture relatives sprinkle on the head of the baby as a sign of prosperity. // People eating aghandz also in the New Year, usually it’s prepared on Easter	NO	_	NO	_	_	_	_	NO	NO	_	_	NO	_	NO	_	NO	Childhood	Parents, other people	_
8.2	Tavush marz, near town Dilijan	2018.09.22	Armenian	NO	Female	1991	Kanep	NO	_	_	_	_	_	YES	Seeds	Aghandz	Mixing with seeds of wheat, roasting on the frying pan, add salt and a little bit water	Human	NO	_	_	_	NO	_	NO	YES	Seeds	Aghandz	Mixing on the frying pan with seeds of wheat and salt. Add small colorfully candies, sweets, popcorn. During the ceremony of Baby's first tooth (“Atamhatik”) this mixture relatives sprinkle on the head of the baby as a sign of prosperity. // People eating aghandz also in the New Year, on Easter. Sometimes it’s prepared for everyday use	NO	_	NO	_	_	_	_	NO	NO	_	_	NO	_	NO	_	NO	Childhood	Relatives, neighbours	_
9	Tavush marz, v. Hovq	2018.09.22	Armenian	NO	Female	1953	Kanep	NO	_	_	_	_	_	YES	Seeds	Aghandz // Flavouring	Mixing with seeds of wheat, roasting on the frying pan, add salt with water // Roasted seeds add to the pastry (inside, outside)	Human	NO	_	_	_	YES	_	NO	YES	Seeds	Aghandz	Mixing on the frying pan with seeds of wheat and salt. Add small colorfully candies, other sweets. During the ceremony of Baby's first tooth (“Atamhatik”) this mixture parents sprinkle on the head of the baby as a sign of prosperity. // People eating aghandz also on other holidays, especially on the Vardavar which is celebrated with big honor in this region of Armenia	NO	_	NO	_	_	_	_	NO	NO	_	_	NO	_	NO	_	NO	Childhood	Relatives, neighbours	Last year police in their village has collected one big auto (Kamaz) of the hemp and burned this hemp
10	Tavush marz, v. Sarigyugh	2018.09.22	Armenian	NO	Female	1983	Kanep	NO	_	_	_	_	_	NO	_	_	_	_	YES	Stems	Hempstring	_	NO	_	NO	YES	_	_	_	NO	_	NO	_	_	_	_	NO	NO	_	_	NO	_	NO	_	NO	_	_	The use of hemp, speaking about that plant could bring to the problems with police
11	Ararat marz, near town Artashat	2018.09.23	Russian	NO	Male	1963	Kanep	NO	_	_	_	_	_	NO	_	_	_	_	YES	Stems	Hempstring	_	YES	_	NO	NO	_	_	_	NO	_	NO	_	_	_	_	NO	NO	_	_	NO	_	NO	_	NO	_	_	Don't want to speak much about the hemp, because using of hemp is against the law. Note, that in Turkmenistan, where he lived some years, the hemp is much more used as a drug
12.1	Syuniq marz, v. Uyts	2018.09.24	Armenian	NO	Male	1957	Kanep	NO	_	_	_	_	_	YES	Seeds	Aghandz	Mixing with seeds of wheat, roasting on the frying pan	Human	NO	_	_	_	NO	Don't know, never was interested for the subject	NO	YES	Seeds	Aghandz	Roast the seeds of wheat, add roasted seeds of hemp, salt, pop-corn. It should be on the table on the New Year	NO	_	NO	_	_	_	_	YES	NO	_	_	NO	_	NO	_	NO	Childhood	Have seen how relatives and neighbors use it	The police exterminate the plants when see the wild or cultivated hemp
12.2	Syuniq marz, v. Uyts	2018.09.24	Armenian	NO	Female	1962	Kanep	NO	_	_	_	_	_	YES	Seeds	Aghandz	Mixing with seeds of wheat, roasting on the frying pan, adding salt dissolve in warm water for the better taste and continue roasting	Human	NO	_	_	_	NO	Don't know, never was interested for the subject	NO	YES	Seeds	Aghandz	Roast the seeds of wheat, add roasted seeds of hemp, salt dissolved in water, popcorn. It is usually prepared for the New Year	NO	_	NO	_	_	_	_	YES	NO	_	_	NO	_	NO	_	NO	Childhood	Have seen how relatives and neighbors use it	Breeding of the hemp is prohibited
13	Syuniq marz, v. Shamb	2018.09.24	Armenian	NO	Male	1950	Kanep	NO	_	_	_	_	_	YES	Seeds	Oil	Have heard that in old time people in other village (Darbas) made oil from the seeds of hemp	Human	NO	_	_	_	NO	Don't know, never was interested for the subject	NO	NO	_	_	_	NO	_	NO	_	_	_	_	NO	NO	_	_	NO	_	YES	_	NO	Childhood	Have seen how relatives and neighbors use it	The police exterminate the plants when see the wild or cultivated hemp
14	Syuniq marz, v. Tatev	2018.09.24	Armenian	NO	Male	1957	Kanef	NO	_	_	_	_	_	YES	Seeds	Aghandz	Mixing with seeds of wheat, roasting. It was years ago, now people don't add the seeds of hemp into aghandz	Human	NO	_	_	_	NO	Don't know, never was interested for the subject	NO	NO	_	_	_	NO	_	NO	_	_	_	_	YES	NO	_	_	NO	_	NO	_	NO	Childhood	Have seen how neighbors use it	_
15.1	Syuniq marz, town Goris	2018.09.25	Armenian	NO	Female	1989	Kanep	NO	_	_	_	_		NO	_	_	_	Human	NO	_	_	_	YES	Don't know, smoking hemp is against the law	NO	NO	_	_	_	NO	_	NO	_	_	_	_	NO	NO	_	_	NO	_	NO	_	NO	_	_	The use of that plant is prohibited
15.2	Syuniq marz, town Goris	2018.09.25	Armenian	NO	Female	1943	Kanep	NO	_	_	_	_	_	YES	Seeds, leaves	Uncooked	When she was a little girl they used to pick the hemp in the field, mash it with hands and eat on place	Human	NO	_	_	_	NO	_	NO	NO	_	_	_	NO	_	NO	_	_	_	_	NO	NO	_	_	NO	_	NO	_	NO	Childhood	Have seen how parents and other children use it	_
16	Sjuniq marz, near v. Nor Arajadzor	2018.09.25	Armenian	NO	Male	1976	Kanep	NO	_	_	_	_	_	NO	_	_	_	_	NO	_	_	_	YES	Don't know. It is against the low	NO	NO	_	_	_	NO	_	NO	_	_	_	The femail plants are bigger, has fruits	NO	NO	_	_	NO	_	YES	_	NO	Since 14-15 years	_	_
17	Syuniq marz, v. Artsvanik	2018.09.25	Armenian	NO	Female	1951	Kanep	NO	_	_	_	_	_	YES	Seeds	Aghandz // Tolma	Roast with wheat grain. In that region people don’t prepare it at all. They used to prepare dishes with Cannabis in Martuni // Doesn’t remember exactly	Human	NO	_	_	_	NO	_	NO	NO	_	_	_	NO	_	NO	_	_	_	_	NO	NO	_	_	NO	_	YES	_	NO	Childhood	Have seen how parents use it	After marriage, approximately 30 years ago, her relatives from Martuni bring one big sack of hemp as a present. The father of her husband has eaten big quantity of not-roasted seeds and fell asleep for the long time, the households where astonished. Father-in-law likes the taste of Cannabis and tried to breeding it in the yard, but the members of family didn't let him do it
18	Sjuniq marz, v. Srashen	2018.09.26	Armenian	NO	Male	1964	Kanep	NO	_	_	_	_	_	YES	_	_	_	_	NO	_	_	_	YES	Doesn’t know, never was interested for the subject	NO	NO	_	_	_	NO	_	NO	_	_	_	_	NO	NO	_	_	NO	_	NO	_	NO	Don't remember	_	_
19	Shirak marz, v. Azatan	2018.09.28	Armenian	NO	Male	1990	Kanep	NO	_	_	_	_	_	NO	_	_	_	_	NO	_	_	_	YES	Mix with tobacco and smoke	NO	NO	_	_	_	NO	_	NO	_	_	_	_	NO	NO	_	_	NO	_	NO	_	NO	Don't remember	_	Doesn't want to speak much about that plant
20.1	Shirak marz, near town Gyumri	2018.09.28	Armenian	NO	Male	1943	Kanep	NO	_	_	_	_	_	NO	_	_	_	_	NO	_	_	_	NO	_	NO	NO	_	_	_	NO	_	NO	_	_	_	_	NO	NO	_	_	NO	_	NO	_	NO	Don't remember	_	This plant is prohibited
20.2	Shirak marz, near town Gyumri	2018.09.28	Armenian	NO	Female	1942	Kanep	NO	_	_	_	_	_	YES	Seeds	Aghandz	Mixing with seeds of wheat, roasting on the frying pan, add salt dissolved in water	Human	NO	_	_	_	NO	_	NO	YES	Seeds	Aghandz	Mixing with seeds of wheat, roasting on the frying pan, add salt dissolved in water. Prepare and eat the aghandz basically on the fest called «Trndez».	NO	_	NO	_	_	_	_	NO	NO	_	_	NO	_	NO	_	NO	Childhood	Parents	_
21	Yerevan	2023.01.09	Armenian	NO	Male	1973	Kanep, Qol (Arm. Կանեփ, Քոլ)	NO	_	_	_	_	_	YES	Seeds	Separate seeds// Aghandz	For Aghandz mixing whith roasted seeds of wheat with a little bit of salt.	Human	YES	Aerial parts	Psychoactive use, which is very differ from the effect from smoking ans very strong. Use only on a full stomach, otherwise at first you don't feel the effect and there is risk of "overtrading". At first the feeling of knock-out, consciousness “floats”, sleepiness, laziness, and difficult to concentrate. Then that feeling goes away and the good mood comes like after smoking of hemp, but stronger a…	Take the big amount of hemp unsuitable for smoking – have no narcotic effect during the smoking (or smaller amount of "suitable for smoking" plants), approximately 5-10 plants for the 20-25 l pan. Press in the pan; add milk to cover the plants. Boil for a long time (it has a bad odor and taste) until the milk boils away up to 1/10 or 1/5 of the initial amount.	YES	For the good mood, sense of joy. Relaxing the nerves, calm. Not aggressive attitude, desire to communicate, dance.	NO	YES	Seeds	Aghandz	Mixing whith roasted seeds of wheat with a little bit salt. Eating at the Christmas, Easter.	NO	_	NO	_	_	_	_	NO	NO	_	_	YES	From the mountains, canyons, in humid places.	YES	YES	NO	Since 16-17 years old	Neigbours	For eating, rituals - relatives.
								1						20
