# Supplementary material for: Bridging past and present: exploring Cannabis traditions in Armenia through ethnobotanical interviews and bibliographic prospecting
Source: J Cannabis Res. 2025 Jan 30;7:8. doi: 10.1186/s42238-025-00259-x (PMC11780856; doi:10.1186/s42238-025-00259-x)
Supplement: Supplementary file 3 — Supplementary Material 3. [file 42238_2025_259_MOESM3_ESM.xlsx]

## Sheet: Bibliographical data 
Supplementary material 3: The table contains the raw data regarding traditional Cannabis use in Armenia obtained with bibliographic search. The search was carried out in Google Scholar and Scopus in English, Armenian and Russian language using several key word combinations. For this search, the Armenian-speaking territory of Nagorno-Karabakh or Artshak has also been considered. Each row reperesen…
Ancient or Recent Reference	Data precision	Reference	Publication year	Reference type	Country	Taxon	Vernacular name	Destination	In	L	Wp	Se*	Ap	St	Bk	Rt	TwB	Sh	O	Re	F	Op	Oil	System category	Medicinal use - Use (P) [vernacular names of diseases]	Medicinal use - Use (S)	Drink / Food	Alimentary use [vernacular names of foods and drinks]	Fibre use categories	Fibre use	Psychoactive use [vernacular names]	Toxicity	Other uses categories	Other uses	Mixture	Internal / External use	Preparation and administration [vernacular names]	Additional information
R	P	Nanagulyan et al., 2020	2020	R	Armenia	Cannabis sativa	Kaneph	H	0	0	0	1	0	0	0	0	0	0	0	0	0	0	0	Immune system disorders and neoplasia	Boosting immune system	For immune system improvement									0	Int	Powdered seeds with water for boosting the immune system and enhancing sexual potency.
R	P	Nanagulyan et al., 2020	2020	R	Armenia	Cannabis sativa	Kaneph	H	0	0	0	1	0	0	0	0	0	0	0	0	0	0	0	Nervous system and mental disorders	Enhancing sexual potency	Sexual stimulant									0	Int	Powdered seeds with water for boosting the immune system and enhancing sexual potency.
R	P	Nanagulyan et al., 2020	2020	R	Armenia	Cannabis sativa	Kaneph	H	0	0	0	1	0	0	0	0	0	0	0	0	0	0	0				Food	Roasted seed mix							1		In a roasted seed mix of wheat, hemp and flax [aghandz].
R	P	Gilyarov (ed.)	1986	B	ex-Soviet Union	Cannabis sativa	Kanaplya (рус. Конопля)	H	0	0	0	0	0	1	0	0	0	0	0	0	1	0	0						Textile	Fibre					0		From stems 30% of fiber - pen'ka (Rus. пенька).	On the territory of the USSR used from 9th centyry as allimentary plant and technical (oil) plant. Culivated hemp originated from Central Asia from 1th millennium BC. Maybe originated in Himalayan region. Grows in wild in Mongolia, India, Turkey, Afghanistan.Cannabis ruderalis is harmful weed of spring crops. Cannabis indica cultivated in tropical and subtropical areas (China, Iran, Turkey, etc.)…
A	P	Yeznik Koghbatsi, 5th century	1994	B	Armenia	Cannabis sp.	Kanephuk (arm. Կանեփուկ)	H	0	0	0	1	0	0	0	0	0	0	0	0	0	0	0	Unclassified	Medicinal uses	Medicinal uses									0		"Hemp is a bush. Its seed is medicine, but also could be cause of loosing desire" (p. 55)	Hovhannisyan (1945) when cited author of the 5th centuary Yeznik Koghbatsi (Eznik of Kolb, arm. Եզնիկ Կողբացի) supposed that Yeznik wrote about Cannabis indica
A	P	Yeznik Koghbatsi, 5th century	1994	B	Armenia	Cannabis sp.	Kanephuk (arm. Կանեփուկ)	H	0	0	0	1	0	0	0	0	0	0	0	0	0	0	0									Hyposexuality			0		"Hemp is a bush. Its seed is medicine, but also could be cause of loosing desire" (p. 55)	Hovhannisyan (1945) when cited author of the 5th centuary Yeznik Koghbatsi (Eznik of Kolb, arm. Եզնիկ Կողբացի) supposed that Yeznik wrote about Cannabis indica
R	P	Zhukovskiy, 1982	1982	B	Ex-Soviet Union	Cannabis sativa	Kanaplya posevnaya (рус. Конопля посевная)	H	0	0	0	0	0	1	0	0	0	0	0	0	1	0	0						Ropes and threads	Ropes					0		From bast fibre obtaned true hemp - pen'ka (Rus. пенька) for ropes, slings, sails, canvas, oakum, etc.	Seeds contain 30-40 % of valuable hemp oil (p. 430).
R	P	Zhukovskiy, 1982	1982	B	Ex-Soviet Union	Cannabis sativa	Kanaplya posevnaya (рус. Конопля посевная)	H	0	0	0	0	0	1	0	0	0	0	0	0	1	0	0						Other uses	Slings					0		From bast fibre obtaned true hemp - pen'ka (Rus. пенька) for ropes, slings, sails, canvas, oakum, etc.	Seeds contain 30-40 % of valuable hemp oil (p. 430).
R	P	Zhukovskiy, 1982	1982	B	Ex-Soviet Union	Cannabis sativa	Kanaplya posevnaya (рус. Конопля посевная)	H	0	0	0	0	0	1	0	0	0	0	0	0	1	0	0						Textile	Sails					0		From bast fibre obtaned true hemp - pen'ka (Rus. пенька) for ropes, slings, sails, canvas, oakum, etc.	Seeds contain 30-40 % of valuable hemp oil (p. 430).
R	P	Zhukovskiy, 1982	1982	B	Ex-Soviet Union	Cannabis sativa	Kanaplya posevnaya (рус. Конопля посевная)	H	0	0	0	0	0	1	0	0	0	0	0	0	1	0	0						Textile	Canvas					0		From bast fibre obtaned true hemp - pen'ka (Rus. пенька) for ropes, slings, sails, canvas, oakum, etc.	Seeds contain 30-40 % of valuable hemp oil (p. 430).
R	P	Zhukovskiy, 1982	1982	B	Ex-Soviet Union	Cannabis sativa	Kanaplya posevnaya (рус. Конопля посевная)	H	0	0	0	0	0	1	0	0	0	0	0	0	1	0	0						Other uses	Oakum					0		From bast fibre obtaned true hemp - pen'ka (Rus. пенька) for ropes, slings, sails, canvas, oakum, etc.	Seeds contain 30-40 % of valuable hemp oil (p. 430).
R	P	Vulf, 1940	1940	B	Ex-Soviet Union	Cannabis sp.	Kanaplya (рус. Конопля)	H	0	0	0	0	0	1	0	0	0	0	0	0	1	0	0						Other uses	Sacks					0		Fiber is used for manufacturing of coarse fabrics: for sacks, canvas, also for cords, ropes. The remaining short fibers are used as oakum - paklya (Rus. пакля), for caulking of ships, boats, homes' overlups, walls, etc.	Obtaining hemp fiber is the same as obtaining fiber of flax. Male plants called paskon' (Rus. посконь), female plants - matyorka (Rus. матёрка). Hemp is cultivated in USSR on about 600 000 hectars. In the Scintific Institute of Cannabis in t. Glukhovo (Ukraine) Grishko breeded new variety of hemp with simultaniously riped of male and fimale plants, wich makes harvesting easier and allows to redus…
R	P	Vulf, 1940	1940	B	Ex-Soviet Union	Cannabis sp.	Kanaplya (рус. Конопля)	H	0	0	0	0	0	1	0	0	0	0	0	0	1	0	0						Textile	Canvas					0		Fiber is used for manufacturing of coarse fabrics: for sacks, canvas, also for cords, ropes. The remaining short fibers are used as oakum - paklya (Rus. пакля), for caulking of ships, boats, homes' overlups, walls, etc.	Obtaining hemp fiber is the same as obtaining fiber of flax. Male plants called paskon' (Rus. посконь), female plants - matyorka (Rus. матёрка). Hemp is cultivated in USSR on about 600 000 hectars. In the Scintific Institute of Cannabis in t. Glukhovo (Ukraine) Grishko breeded new variety of hemp with simultaniously riped of male and fimale plants, wich makes harvesting easier and allows to redus…
R	P	Vulf, 1940	1940	B	Ex-Soviet Union	Cannabis sp.	Kanaplya (рус. Конопля)	H	0	0	0	0	0	1	0	0	0	0	0	0	1	0	0						Ropes and threads	Cords					0		Fiber is used for manufacturing of coarse fabrics: for sacks, canvas, also for cords, ropes. The remaining short fibers are used as oakum - paklya (Rus. пакля), for caulking of ships, boats, homes' overlups, walls, etc.	Obtaining hemp fiber is the same as obtaining fiber of flax. Male plants called paskon' (Rus. посконь), female plants - matyorka (Rus. матёрка). Hemp is cultivated in USSR on about 600 000 hectars. In the Scintific Institute of Cannabis in t. Glukhovo (Ukraine) Grishko breeded new variety of hemp with simultaniously riped of male and fimale plants, wich makes harvesting easier and allows to redus…
R	P	Vulf, 1940	1940	B	Ex-Soviet Union	Cannabis sp.	Kanaplya (рус. Конопля)	H	0	0	0	0	0	1	0	0	0	0	0	0	1	0	0						Ropes and threads	Ropes					0		Fiber is used for manufacturing of coarse fabrics: for sacks, canvas, also for cords, ropes. The remaining short fibers are used as oakum - paklya (Rus. пакля), for caulking of ships, boats, homes' overlups, walls, etc.	Obtaining hemp fiber is the same as obtaining fiber of flax. Male plants called paskon' (Rus. посконь), female plants - matyorka (Rus. матёрка). Hemp is cultivated in USSR on about 600 000 hectars. In the Scintific Institute of Cannabis in t. Glukhovo (Ukraine) Grishko breeded new variety of hemp with simultaniously riped of male and fimale plants, wich makes harvesting easier and allows to redus…
R	P	Vulf, 1940	1940	B	Ex-Soviet Union	Cannabis sp.	Kanaplya (рус. Конопля)	H	0	0	0	0	0	1	0	0	0	0	0	0	1	0	0						Other uses	Oakum - paklya (Rus. пакля)					0		Fiber is used for manufacturing of coarse fabrics: for sacks, canvas, also for cords, ropes. The remaining short fibers are used as oakum - paklya (Rus. пакля), for caulking of ships, boats, homes' overlups, walls, etc.	Obtaining hemp fiber is the same as obtaining fiber of flax. Male plants called paskon' (Rus. посконь), female plants - matyorka (Rus. матёрка). Hemp is cultivated in USSR on about 600 000 hectars. In the Scintific Institute of Cannabis in t. Glukhovo (Ukraine) Grishko breeded new variety of hemp with simultaniously riped of male and fimale plants, wich makes harvesting easier and allows to redus…
R	P	Vulf, 1940	1940	B	Ex-Soviet Union	Cannabis sp.	Kanaplya (рус. Конопля)	H	0	0	0	0	0	1	0	0	0	0	0	0	1	0	0						Other uses	Oakum - paklya (Rus. пакля)					0		Fiber is used for manufacturing of coarse fabrics: for sacks, canvas, also for cords, ropes. The remaining short fibers are used as oakum - paklya (Rus. пакля), for caulking of ships, boats, homes' overlups, walls, etc.	Obtaining hemp fiber is the same as obtaining fiber of flax. Male plants called paskon' (Rus. посконь), female plants - matyorka (Rus. матёрка). Hemp is cultivated in USSR on about 600 000 hectars. In the Scintific Institute of Cannabis in t. Glukhovo (Ukraine) Grishko breeded new variety of hemp with simultaniously riped of male and fimale plants, wich makes harvesting easier and allows to redus…
R	P	Vulf, 1940	1940	B	Ex-Soviet Union	Cannabis sp.	Kanaplya (рус. Конопля)	H	0	0	0	0	0	1	0	0	0	0	0	0	1	0	0						Other uses	Oakum - paklya (Rus. пакля)					0		Fiber is used for manufacturing of coarse fabrics: for sacks, canvas, also for cords, ropes. The remaining short fibers are used as oakum - paklya (Rus. пакля), for caulking of ships, boats, homes' overlups, walls, etc.	Obtaining hemp fiber is the same as obtaining fiber of flax. Male plants called paskon' (Rus. посконь), female plants - matyorka (Rus. матёрка). Hemp is cultivated in USSR on about 600 000 hectars. In the Scintific Institute of Cannabis in t. Glukhovo (Ukraine) Grishko breeded new variety of hemp with simultaniously riped of male and fimale plants, wich makes harvesting easier and allows to redus…
R	P	Vulf, 1940	1940	B	Ex-Soviet Union	Cannabis sp.	Kanaplya (рус. Конопля)	H	0	0	0	0	0	1	0	0	0	0	0	0	1	0	0						Other uses	Oakum - paklya (Rus. пакля)					0		Fiber is used for manufacturing of coarse fabrics: for sacks, canvas, also for cords, ropes. The remaining short fibers are used as oakum - paklya (Rus. пакля), for caulking of ships, boats, homes' overlups, walls, etc.	Obtaining hemp fiber is the same as obtaining fiber of flax. Male plants called paskon' (Rus. посконь), female plants - matyorka (Rus. матёрка). Hemp is cultivated in USSR on about 600 000 hectars. In the Scintific Institute of Cannabis in t. Glukhovo (Ukraine) Grishko breeded new variety of hemp with simultaniously riped of male and fimale plants, wich makes harvesting easier and allows to redus…
R	P	Yatsenko-Khmelevskiy, 1980	1980	B	Ex-Soviet Union	Cannabis sativa	Kanaplya posevnaya (рус. Конопля посевная)	H	0	0	0	0	0	1	0	0	0	0	0	0	1	0	0						Oakum, paklya - Rus. пакля	Cleaning					0		Hemp fiber basically were used for ropes, twines, wrapping twines and packthread, part of the raw material were imported (true hemp, pen'ka - Rus. пенька); waste products (oakum, paklya - Rus. пакля) was widely use as cleaning and frost-protection material.	In the North (app. up to 45° northerly latitude) hemp is used as textile, edibleplant and partly - technical (oil) plant. On the South, basically in Asia (China, N India, Pakistan, Afghanistan and Turkye), partly in Africa, started from 16th century - also in N and S America hemp cultivated as a source of narcotics, rarely - drugs /medicine/. In the conditions of temparete and cold climate hemp p…
R	P	Yatsenko-Khmelevskiy, 1980	1980	B	Ex-Soviet Union	Cannabis sativa	Kanaplya posevnaya (рус. Конопля посевная)	H	0	0	0	0	0	1	0	0	0	0	0	0	1	0	0						Oakum, paklya - Rus. пакля	Frost protection					0		Hemp fiber basically were used for ropes, twines, wrapping twines and packthread, part of the raw material were imported (true hemp, pen'ka - Rus. пенька); waste products (oakum, paklya - Rus. пакля) was widely use as cleaning and frost-protection material.	In the North (app. up to 45° northerly latitude) hemp is used as textile, edibleplant and partly - technical (oil) plant. On the South, basically in Asia (China, N India, Pakistan, Afghanistan and Turkye), partly in Africa, started from 16th century - also in N and S America hemp cultivated as a source of narcotics, rarely - drugs /medicine/. In the conditions of temparete and cold climate hemp p…
R	P	Araratyan, Melikyan, Melikyan, 1955	1955	RW	Ex-Soviet Union	Cannabis sativa		H	0	0	0	1	0	0	0	0	0	0	0	0	0	0	0				Food								0			Mentioned as well-known oil bearing plant.
R	P	Stoletova, 1930	1930	R	Armenia	Cannabis sp.	Kanap (Arm. Կանափ)	H	0	0	0	1	0	0	0	0	0	0	0	0	0	0	1				Food	Shira (oil contining liquid)							0		Local people use hemp for preparing white liquid containing oil called shira (Arm. շիրա). For that purpose lightly roast seeds, then bray in mortar or on the special stones - sand (Arm. սանդ): one stone has a recess in which seeds are poured, with another stone beate. Than powdered seeds mix with hot water, carefully grind. The obtained white milk-like liquid (shira) squeeze and filter through th…	People use both Cannabis sativa, C. ruderalis and also hybrid forms.
R	P	Stoletova, 1930	1930	R	Armenia	Cannabis sp.	Kanap (Arm. Կանափ)	H	0	0	0	1	0	0	0	0	0	0	0	0	0	0	0				Food	Aghandz							1		Seeds of hemp local people roast with salt, wheat, chickpea and sesame. This delicacy eaten during the festivities (as in Russia people use seeds of sunflower).	People use both Cannabis sativa, C. ruderalis and also hybrid forms.
R	P	Stoletova, 1930	1930	R	Armenia	Cannabis sp.	Kanap (Arm. Կանափ)	H	0	0	0	0	0	1	0	0	0	0	0	0	0	1	0										Miscellaneous use	Support for vines	0		Local people cut the ends of the lateral shoots, remain the main stem with "hooks", which used as support for grapewine.	Rather rare hemp used for fiber here, basically for that purpose wool is in use (only in Russian settlements in Armenia it's common to use hemp for the fiber manufacturing). Also hemp used for "hashish".
R	P	Grossheim, 1952	1952	B	Ex-Soviet Union	Cannabis sp.	Kanep (Arm.), Kanapi (Georg.), Chetene (Azerb.),	H	0	0	0	0	0	0	0	0	0	0	0	0	1	0	0						Fibre	Coarse yarn					0		The quality of the fibre obtained from the wild hemp is identical to the fiber of the cultivated hemp. It's basically used for production of the coarse yarn and soft packaging, also for manufacturing of the tow/ oakum (p. 377, 525) .	Plant is fortified with vitamins. "In the beginning of fruiting in leaves of Cannabis sativa contains 13 gamma /1000 gamma = 1 mg/ of vitamin A, according to other sources 330 gamm" (p. 218). "In seeds of C. sativa there is a some amount of vitamin D" (p. 227) and "about 40 units of vitamin K" (p. 230). "Leaves of C. ruderalis contains 249,7 - 385,3 mg% of vitamin C" (p. 246). Cannabis is also va…
R	P	Grossheim, 1952	1952	B	Ex-Soviet Union	Cannabis sp.	Kanep (Arm.), Kanapi (Georg.), Chetene (Azerb.),	H	0	0	0	0	0	0	0	0	0	0	0	0	1	0	0						Fibre	Soft packaging					0		The quality of the fibre obtained from the wild hemp is identical to the fiber of the cultivated hemp. It's basically used for production of the coarse yarn and soft packaging, also for manufacturing of the tow/ oakum (p. 377, 525) .	Plant is fortified with vitamins. "In the beginning of fruiting in leaves of Cannabis sativa contains 13 gamma /1000 gamma = 1 mg/ of vitamin A, according to other sources 330 gamm" (p. 218). "In seeds of C. sativa there is a some amount of vitamin D" (p. 227) and "about 40 units of vitamin K" (p. 230). "Leaves of C. ruderalis contains 249,7 - 385,3 mg% of vitamin C" (p. 246). Cannabis is also va…
R	P	Grossheim, 1952	1952	B	Ex-Soviet Union	Cannabis sp.	Kanep (Arm.), Kanapi (Georg.), Chetene (Azerb.),	H	0	0	0	0	0	0	0	0	0	0	0	0	1	0	0						Fibre	Tow/oakum					0		The quality of the fibre obtained from the wild hemp is identical to the fiber of the cultivated hemp. It's basically used for production of the coarse yarn and soft packaging, also for manufacturing of the tow/ oakum (p. 377, 525) .	Plant is fortified with vitamins. "In the beginning of fruiting in leaves of Cannabis sativa contains 13 gamma /1000 gamma = 1 mg/ of vitamin A, according to other sources 330 gamm" (p. 218). "In seeds of C. sativa there is a some amount of vitamin D" (p. 227) and "about 40 units of vitamin K" (p. 230). "Leaves of C. ruderalis contains 249,7 - 385,3 mg% of vitamin C" (p. 246). Cannabis is also va…
A, R	P	Kharatyan-Araqelyan, 2005	2005	B	Armenia	Cannabis sp.	Kanep (arm. Կանեփ)	H	0	0	0	1	0	0	0	0	0	0	0	0	0	0	0				Food	Aghandz							1		Seeds of hemp customary used in different regions of Armenia for prepearing of delicacy called aghandz (Arm. աղանձ). For preparing aghandz mix roasted /with salt/ seeds of wheat, cannabis, also raisin, shelled walnuts, almonds, somethimes - roasted seeds of chickpea (p. 24). That dish is prepeared for traditional holydays. From the 19th century it served for the New year - Amanor (Arm. Ամանոր) ho…
A, R	P	Kharatyan-Araqelyan, 2005	2005	B	Armenia	Cannabis sp.	Kanep (arm. Կանեփ)	H	0	0	0	1	0	0	0	0	0	0	0	0	0	0	0				Food	Aghandz					Magicoreligious	For festivalsTrndez and Sanct Sarqis - Surb Sarqis, they prepare aghandz	1		Seeds of hemp customary used in different regions of Armenia for prepearing of delicacy called aghandz (Arm. աղանձ). For preparing aghandz mix roasted /with salt/ seeds of wheat, cannabis, also raisin, shelled walnuts, almonds, somethimes - roasted seeds of chickpea (p. 24). For fest called Trndez (Arm. Տրնդեզ, festival of fire, came from pagan times), February 14, mother-in-low with other gifts …
A, R	NA	Bdoyan, 1972	1972	B	Armenia	Cannabis sp.		H	0	0	0	0	0	0	0	0	0	0	0	0	0	0	0				Food	Aghandz					Magicoreligious	For festival Trndez they prepare aghandz	1		On the Trndez (Arm. Տրնդեզ, festival of fire, came from pagan times) in every family people prepared and eat aghandz (Arm. աղանձ), whch contained seeds and different dried fruits. Aghandz (other names - khatsagh (Arm. խածաղ) or khetsagh (Arm. խեծաղ)) had a mistical significans - seeds and fruits have role of "preparing" of awakening of nature. /There are description of one more ritual with agandz…	A video on preparing of the traditional version of Aghandz for the festival of fire: https://www.youtube.com/watch?v=YsSmKO5X98U
A	P	Amirdovlat Amasiatsi, 15th century	1990	B	Armenia	Cannabis sativa	Kanap, Ganap, Kanepat (Arm. Կինափ, Գանապ, Կանեփատ)	H	0	0	0	1	0	0	0	0	0	0	0	0	0	0	0									Toxicity - stop emmition of sperm			0	Int.	"Eat too much of the seeds of hemp (kanepat, Arm. կանեփատ) could be cause of the stop of emission of seed /sperm/", "...To avoid the adverse effects of seeds it is better to drink it with cold water." "...And if you roast and eat /the seeds of kanepat/ - harm will be less. And best of all to drink seeds with honey-vinegar mixture …"(p. 239, notes on the page 670)	Author cited vernacular names in Arabian, Persian, Turk languages (pp. 189, 190, 338, 382, 639, 640, 645, 670, 717, 721, 722, 741). Lot of informationa about nutricious features, medicinal use and also toxicity in Armenia and in other countries (pp. 195, 239, 345): "...There are also another type - indian hemp, 'hndi kanap' (Arm. հնդի կանափ). In Shiraz (Persia) it is called pank (from sanskrit Bh…
A	P	Amirdovlat Amasiatsi, 15th century	1990	B	Armenia	Cannabis sativa	Kanap, Ganap, Kanepat (Arm. Կինափ, Գանապ, Կանեփատ)	H	0	0	0	1	0	0	0	0	0	0	0	0	0	0	0	Sensory system disorders	Pain relief in ear	For otalgia									0	Ext.	"Sqeeze fresh seeds and putting drops in ear and it will ease the pain... ՞ (p. 239, notes on the page 670)	Author cited vernacular names in Arabian, Persian, Turk languages (pp. 189, 190, 338, 382, 639, 640, 645, 670, 717, 721, 722, 741). Lot of informationa about nutricious features, medicinal use and also toxicity in Armenia and in other countries (pp. 195, 239, 345): "...There are also another type - indian hemp, 'hndi kanap' (Arm. հնդի կանափ). In Shiraz (Persia) it is called pank (from sanskrit Bh…
A	P	Amirdovlat Amasiatsi, 15th century	1990	B	Armenia	Cannabis sativa	Kanap, Ganap, Kanepat (Arm. Կինափ, Գանապ, Կանեփատ)	H	0	0	0	1	0	0	0	0	0	0	0	0	0	0	0	Digestive system and nutritional disorders	Harmfull substances in stomach	Digestive									0	Int.	"Eat hemp and it will remove harmeful substances from the stomach, and it is also antidiarrheal…" (p. 239, notes on the page 670)	Author cited vernacular names in Arabian, Persian, Turk languages (pp. 189, 190, 338, 382, 639, 640, 645, 670, 717, 721, 722, 741). Lot of informationa about nutricious features, medicinal use and also toxicity in Armenia and in other countries (pp. 195, 239, 345): "...There are also another type - indian hemp, 'hndi kanap' (Arm. հնդի կանափ). In Shiraz (Persia) it is called pank (from sanskrit Bh…
A	P	Amirdovlat Amasiatsi, 15th century	1990	B	Armenia	Cannabis sativa	Kanap, Ganap, Kanepat (Arm. Կինափ, Գանապ, Կանեփատ)	H	0	0	0	1	0	0	0	0	0	0	0	0	0	0	0	Digestive system and nutritional disorders	Antidiarrhoeal	Antidiarrhoeal									0	Int.	"Eat hemp and it will remove harmeful substances from the stomach, and it is also antidiarrheal…" (p. 239, notes on the page 670)	Author cited vernacular names in Arabian, Persian, Turk languages (pp. 189, 190, 338, 382, 639, 640, 645, 670, 717, 721, 722, 741). Lot of informationa about nutricious features, medicinal use and also toxicity in Armenia and in other countries (pp. 195, 239, 345): "...There are also another type - indian hemp, 'hndi kanap' (Arm. հնդի կանափ). In Shiraz (Persia) it is called pank (from sanskrit Bh…
A	P	Amirdovlat Amasiatsi, 15th century	1990	B	Armenia	Cannabis sativa	Kanap, Ganap, Kanepat (Arm. Կինափ, Գանապ, Կանեփատ)	H	0	0	0	1	0	0	0	0	0	0	0	0	0	0	0	Genitourinary system disorders	Increase urination	Diuretic									0	Int.	"Eat hemp and it will... Make abundant urination and triggers the formation of the yellow bile…" (p. 239, notes on the page 670)	Author cited vernacular names in Arabian, Persian, Turk languages (pp. 189, 190, 338, 382, 639, 640, 645, 670, 717, 721, 722, 741). Lot of informationa about nutricious features, medicinal use and also toxicity in Armenia and in other countries (pp. 195, 239, 345): "...There are also another type - indian hemp, 'hndi kanap' (Arm. հնդի կանափ). In Shiraz (Persia) it is called pank (from sanskrit Bh…
A	P	Amirdovlat Amasiatsi, 15th century	1990	B	Armenia	Cannabis sativa	Kanap, Ganap, Kanepat (Arm. Կինափ, Գանապ, Կանեփատ)	H	0	0	0	1	0	0	0	0	0	0	0	0	0	0	0	Endocrine system and metabolic disorders	Increase production of yellow bile	Jaundice (side effect)									0	Int.	"Eat hemp and it will... Make abundant urination and triggers the formation of the yellow bile…" (p. 239, notes on the page 670)	Author cited vernacular names in Arabian, Persian, Turk languages (pp. 189, 190, 338, 382, 639, 640, 645, 670, 717, 721, 722, 741). Lot of informationa about nutricious features, medicinal use and also toxicity in Armenia and in other countries (pp. 195, 239, 345): "...There are also another type - indian hemp, 'hndi kanap' (Arm. հնդի կանափ). In Shiraz (Persia) it is called pank (from sanskrit Bh…
A	P	Amirdovlat Amasiatsi, 15th century	1990	B	Armenia	Cannabis sativa	Kanap, Ganap, Kanepat (Arm. Կինափ, Գանապ, Կանեփատ)	H	0	1	0	0	0	0	0	0	0	0	0	0	0	0	0										Cosmetology	Strengthens the hair	0	Ext.	"And if crush the leaves, squeeze the the juice - it will clean out and strengthen the hair" (p. 239, notes on the page 670)	Author cited vernacular names in Arabian, Persian, Turk languages (pp. 189, 190, 338, 382, 639, 640, 645, 670, 717, 721, 722, 741). Lot of informationa about nutricious features, medicinal use and also toxicity in Armenia and in other countries (pp. 195, 239, 345): "...There are also another type - indian hemp, 'hndi kanap' (Arm. հնդի կանափ). In Shiraz (Persia) it is called pank (from sanskrit Bh…
A	P	Amirdovlat Amasiatsi, 15th century	1990	B	Armenia	Cannabis sp.	Kanap, Ganap, Kanepat (Arm. Կինափ, Գանապ, Կանեփատ)	H	0	0	0	0	0	0	0	1	0	0	0	0	0	0	0	Immune system disorders and neoplasia	Softening hard tumors	Antitumour									0	Ext.	"And the wild hemp looks like althaea, but shorter than it. If you boil its root and make a poultice - it will help in case of hot and solid tumors and makes them softer" (p. 239, notes on the page 670)	Author cited vernacular names in Arabian, Persian, Turk languages (pp. 189, 190, 338, 382, 639, 640, 645, 670, 717, 721, 722, 741). Lot of informationa about nutricious features, medicinal use and also toxicity in Armenia and in other countries (pp. 195, 239, 345): "...There are also another type - indian hemp, 'hndi kanap' (Arm. հնդի կանափ). In Shiraz (Persia) it is called pank (from sanskrit Bh…
A	P	Amirdovlat Amasiatsi, 15th century	1990	B	Armenia	Cannabis sativa	Kanap, Ganap, Kanepat (Arm. Կինափ, Գանապ, Կանեփատ)	H	0	0	0	1	0	0	0	0	0	0	0	0	0	0	0	Digestive system and nutritional disorders	Weight gain	Appetite stimulant	Food								0		"Promote/ stimulate to the gain weight… Very nutritious" (p. 195, notes on the page 645)	Author cited vernacular names in Arabian, Persian, Turk languages (pp. 189, 190, 338, 382, 639, 640, 645, 670, 717, 721, 722, 741). Lot of informationa about nutricious features, medicinal use and also toxicity in Armenia and in other countries (pp. 195, 239, 345): "...There are also another type - indian hemp, 'hndi kanap' (Arm. հնդի կանափ). In Shiraz (Persia) it is called pank (from sanskrit Bh…
A	P	Amirdovlat Amasiatsi, 15th century	1990	B	Armenia	Cannabis sativa	Kanap, Ganap, Kanepat (Arm. Կինափ, Գանապ, Կանեփատ)	H	0	0	0	1	0	0	0	0	0	0	0	0	0	0	0	Tonic and restorative	Exhaustion recovery	Tonic									1	Int.	"If crush, soak in a water and give to the man, who get weak from the cold and loss of water, it will help" (p. 195, notes on the page 645)	Author cited vernacular names in Arabian, Persian, Turk languages (pp. 189, 190, 338, 382, 639, 640, 645, 670, 717, 721, 722, 741). Lot of informationa about nutricious features, medicinal use and also toxicity in Armenia and in other countries (pp. 195, 239, 345): "...There are also another type - indian hemp, 'hndi kanap' (Arm. հնդի կանափ). In Shiraz (Persia) it is called pank (from sanskrit Bh…
A	P	Srvandztiants, 1876	1978	B	Armenia	Cannabis sp.	Kanapat (Arm. Կանափատ)	H	0	0	0	1	0	0	0	0	0	0	0	0	0	0	0				Food	Rosted seed							0		"The seeds (hat or hunt, Arm. հատ or հունտ) of hemp (kanapat, Arm. կանափատ) people roast and eat..." (p. 356).
A	P	Srvandztiants, 1876	1978	B	Armenia	Cannabis sp.	Kanapat (Arm. Կանափատ)	H	0	0	0	1	0	0	0	0	0	0	0	0	0	0	0				Food	Pounded boiled seeds							1		"/People/ pounded the boiled seeds in a mortar, and distinguished milk /oil/ they use for food in the fasting days." (p. 356, apparently add to the dishes)
A	NA	Srvandztiants, 1876	1978	B	Armenia	Cannabis sp.	Kanap (Arm. Կանափ)	H	0	0	0	0	0	0	0	0	0	0	0	0	0	0	0	Nervous system and mental disorders	Speech difficulties	For aphasia									0	Ext.	"For the sick man who has tongue-tied /speechless/ - grease the oil of the hemp (kanapi yegh, Arm. կանափի եղ) under the foot, it helps to loosen up" (p. 284). /probably from seeds as it ussually done in Armenia.	Same author cite (on the p. 124) also ancient author of 5th century Yeznik Koghbatsi (cf. Yeznik Koghbatsi, 1994): "Hemp (kanepuk, Arm. Կանեփուկ) is a bush. Its seed is medicine, but also could be cause of loosing desire."
A	NA	Avetiqyan et al., 1836	1836	B	Armenia	Cannabis sp.	Kanap, kanep (Arm. Կանափ, կանեփ)	H	0	0	0	0	0	0	0	0	0	0	0	0	0	0	0	Unclassified	Medicinal uses	Medicinal uses									0		"Hemp grind, oil will separate, take it and use." (cited from the old medical book, p. 1048)
R	P	Hovsepyan et al., 2014	2014	R	Armenia	Cannabis sativa	Kinep (Arm. Կինեփ)	H	0	0	0	1	0	0	0	0	0	0	0	0	0	0	0				Food	Tolma							1		Some Yezidies and Kurds people living in Armenia use seeds for preparing of tolma (Arm. Տոլմա, as Armeninas living in Martuni region of Armenia).	Some of Yezidies and Kurds, according to interviews, consider hemp as forbidden plant because of its bad reputation as a narcotic. See also 1:35 of the video https://www.youtube.com/watch?v=jYkr-pS81gc
R	P	Hovsepyan et al., 2016	2016	R	Armenia	Cannabis sativa	Kanep (Arm. Կանեփ)	H	0	0	0	1	0	0	0	0	0	0	0	0	0	0	0				Food	Tolma, aghandz or individually							1		Used for food (in tolma, aghandz or just separate), but sometimes considered by Yezidies as taboo food plant: "Some informants said that cannabis (Cannabis sativa L.) is forbidden for Yezidis, because it has narcotic features. ...However, these stories about lettuce, beans, hemp, and sunflower being forbidden for Yezidis are episodic cases; most of our informants never heard about any forbidden p…
R	NA	Petrov, 1940	1940	B	Nagorno-Karabakh Republic (or "Artsakh" in Armenian, border of the Armenia and Azerbaijan)	Cannabis ruderalis	Kinep (Arm. Կինեփ), Siremna (Arm. Սիրեմնա, in Jraberd region only), Jetana (azerb.)	H	0	0	0	0	0	0	0	0	0	0	0	0	0	0	0						Ropes and twines	Ropes					0		Local people made ropes from the wild-growing hemp.	Highly polymorphic here.
R	NA	Boyajyan, 2013	2013	R	Armenia	Cannabis sp.	NA	H	0	0	0	0	0	0	0	0	0	0	0	0	0	0	0				Food	Oil									At the beginning of 20th century hemp was used in the Gyumri region (north part of Armenia) as an oil plant (alongside with castor and flaxseed oil).
R	P	Vardanyan, 2004	2004	B	Armenia	Cannabis sp.	Kenep (Arm. կէնէփ), Khin (Arm. խին)	H	0	0	0	1	0	0	0	0	0	0	0	0	0	0	0				Food	Oil									Khin (Arm. խին) is a vegetable oil obtained from the hemp (Kenep (Arm. կէնէփ)), flax or other plants by pearling seeds in a mortar.	Kenep (Arm. կէնէփ) – is a vernacular name of the hemp used in the Vayots Dzor province of Armenia.
R	NA	Vardanyan, 2004	2004	B	Armenia	Cannabis sp.	Kenep (Arm. կէնէփ), Kodzig (Arm. կօձիգ)	H	0	0	0	0	0	0	0	0	0	0	0	0	0	0	0										Miscellaneous use	Houshold glue			Kodzig (Arm. կօձիգ) is a glue made from stucco, hemp thread and eggs, which was used for sticking of the broken tableware.	Kenep (Arm. կէնէփ) – is a vernacular name of the hemp used in the Vayots Dzor province of Armenia.
R	NA	Alishan, 1895	1895	B	Armenia	Cannabis sp.		H	0	0	0	0	0	0	0	0	0	0	0	0	0	0	0	Unclassified	Medicinal uses												Cannabis is used for medicine.	Author of the 19 th century, Ghevond Alishan, in his fundamental work about Armenian flora gives the names of the Cannabis in different languages, including Latin, French, Arabic, etc.
R	P	Alishan, 1895	1895	B	Armenia	Cannabis sp.		H	0	0	0	1	0	0	0	0	0	0	0	0	0	0	0				Food	Seeds									The seeds of hemp are eaten by itself, but also used for producing oil.	Author of the 19 th century, Ghevond Alishan, in his fundamental work about Armenian flora gives the names of the Cannabis in different languages, including Latin, French, Arabic, etc.
R	P	Alishan, 1895	1895	B	Armenia	Cannabis sp.		H	0	0	0	1	0	0	0	0	0	0	0	0	0	0	0				Food	Oil									The seeds of hemp are eaten by itself, but also used for producing oil.	Author of the 19 th century, Ghevond Alishan, in his fundamental work about Armenian flora gives the names of the Cannabis in different languages, including Latin, French, Arabic, etc.
R	NA	Alishan, 1895	1895	B	Armenia	Cannabis sp.		H	0	0	0	0	0	0	0	0	0	0	0	0	0	0	0						Textile	Clothes							Cannabis is used for producing clothes (no plant part mentioned).	Author of the 19 th century, Ghevond Alishan, in his fundamental work about Armenian flora gives the names of the Cannabis in different languages, including Latin, French, Arabic, etc.
R	NA	Alishan, 1895	1895	B	Armenia	Cannabis sp.		H	0	0	0	0	0	0	0	0	0	0	0	0	0	0	0								Psychoactive use						Cannabis is used as psychedelic plant.	Author of the 19 th century, Ghevond Alishan, in his fundamental work about Armenian flora gives the names of the Cannabis in different languages, including Latin, French, Arabic, etc.
									0	1	0	25	0	17	0	1	0	0	0	0	19	1	1	65

## Sheet: Abbrev.&Explanations
The legend for the abbreviations found in the table Bibliographic data
Ancient or Recent Reference		If the reference was written before aprox 1800) we add letter "A" (ancient), if the reference was published recently, we add letter "R" (recent)
Data precition		Some data found in papers are not always very clearly stated - sometimes authors state something like " seeds, leaves and fibers are used for caugh and for making ropes". Logically we would say that seed and leaves are used for medicinal use and fiber for rope production, but we can not be 100%. So we add all three plant parts in all three uses, and mark those reports as ''U" - unprecise; we use …
Reference		For published references: (Author, year of publication) - full reference goes in "Publications" sheet; for unpublished ethnobotanical interviews: (Authors initials, sequential number of the interview)
Publication year
Reference type		RW – review, R – research, MSc – master thesis, PhD – PhD thesis, B - Book, EtIn - unpublished ethnobotanical interview
Country
Taxon
Vernacular name
Destination		H – human use, A – animal use
Plant parts	In	Inflorescences
	L	Leaf
	Wp	Whole plant
	Se*	Seed (*In this database, the term ‘seed’ actually refers to the Cannabis fruit, a nut (also called achene) with the only seed not separated from the fruit for use. In the reviewed literature, this part was named with several terms (fruit, young fruit, nut, achene, seed).)
	Ap	Aerial part
	St	Stem
	Bk	Bark
	Rt	Root
	TwB	Twig and branch
	Sh	Shoot
	O	Other plant parts
Plant products	Re	Resin
	F	Fibre
	Op	other plant products
System category		Body system category (circulatory system and blood disorders, digestive system and nutritional disorders, endocrine system and metabolic disorders, genitourinary system disorders, immune system disorders and neoplasia, infections and infestations, musculoskeletal system disorders and traumas, nervous system and mental disorders, pain and inflammations, poisoning, pregnancy, birth and puerperal di…
System category 2		Additional body system category (same as before)
Medicinal use -Use (P) [vernacular names of diseases]		Medicinal use as stated by the authors in the paper
Medicinal use - Use (S)		Standarized medicinal use
Drink / Food		Type of alimentary use
Alimentary use [vernacular names of foods and drinks]		The actual alimentary use
Fibre use categories		Bigger categories of fibre uses (fibre use, textile, ropes and threads, other uses)
Fibre use		The actual fibre use
Psychoactive use [vernacular names]
Toxicity
Other uses - categories		Bigger categories of other uses (cosmetic, magicoreligious, firewood and miscellaneous use)
Other uses
Mixture		Only for medicinal use; if Cannabis is used together with other ingreedients in medicinal preparations
Int / Ext		Type of use: Int – internal use, Ext – external use
Preparation and administration [vernacular names]		Detailed information on preparation and administration of Cannabis for different use types provided by the authors.
Additional information		Any other additional information about the Cannabis use.

## Sheet: References
Reference (Table)	Refernce (Full)
Amirdovlat Amasiatsi, 15th century	Amasiatsi A. Useless for Ignoramuses. Translated. Moscow: Nauka Publ., Scientific legacy, 13, Moscow; 1990. (In Russian)
Araratyan, Melikyan, Melikyan, 1955	Araratyan, A. G., Melikyan, N. M. Oil-producing wild plants of Armenia. Coll. of Scient Works of Arm. Agr. Inst., 9; 1955, 195–213. (In Russian)
Avetiqyan et al., 1836	Avetiqyan, G., Syurmeljan, Kh., Avgeryan, M. New Dictionary of the Armenian Language. Saint Lazar publishing house. Venice. v. 1; 1836, 1142 p. (In Armenian)
Bdoyan, 1972	Bdoyan VH. Land-farming culture in Armenia. Publishing House of the Academy of Sciences of the Arm. SSR, Yerevan; 1972. (In Armenian)
Gilyarov (ed.)	Gilyarov, M. S. (ed.) Cannabis. In: Biological encyclopedical dictionary. Sovetskaya entsiklopediya, Moscow, 1986, p. 277. (In Russian)
Grossheim, 1952	Grossheim AA. Plant wealth of the Caucasus. Moskovskoe obshchestvo ispytatelei prirody Publ., Moscow; 1952. (In Russian)
Hovsepyan et al., 2014	Hovsepyan R, Stepanyan-Gandilyan N, Melkumyan H. Plant Cultivation and Gathering Practices in Yezidis’ and Kurds’ Cultures (preliminary data). Hist J 2014;3:148-162. (In Armenian)
Hovsepyan et al., 2016	Hovsepyan R, Stepanyan-Gandilyan N, Melkumyan H, Harutyunyan L. Food as a marker for economy and part of identity: traditional vegetal food of Yezidis and Kurds in Armenia. J Ethn Foods 2016;3:32–41. https://doi.org/10.1016/j.jef.2016.01.003.
Kharatyan-Araqelyan, 2005	Kharatyan-Arakelyan H. Armenian folk festivals. Publ. Zangak - 97, Yerevan; 2005. (In Armenian)
Nanagulyan et al., 2020	Nanagulyan S, Zakaryan N, Kartashyan N, Piwowarczyk R, Łuczaj Ł. Wild plants and fungi sold in the markets of Yerevan (Armenia). J Ethnobiol Ethnomed 2020;16:26. https://doi.org/https://doi.org/10.1186/s13002-020-00375-3.
Petrov, 1940	Petrov VA. Ethnobotany of Nagorno-Karabakh. Baku: Publ. FAS AZ; 1940. (In Russian)
Srvandztiants, 1876	Srvandztyants G. Manana. Collect. Ed. Vol. 1, Publishing House of the Academy of Sciences of the Arm. SSR, Yerevan; 1876, p. 117–364. (In Armenian)
Stoletova, 1930	Stoletova EA. Field and vegetable crops of Armenia. Bull Appl Bot Genet Plant-Breeding 1930;24:1–376 (In Russian).
Vulf, 1940	Vulf YV. Cannabis. main Crop plants Descr. Orig., Selkhozgiz, Moscow; 1940, p. 101–103. (In Russian).
Yatsenko-Khmelevskiy, 1980	Yatsenko-Khmelevskiy AA. Cannabaceae. In: Takhtajan AL, editor. Flower. plants. Plant life, Prosvescheniye, Moscow, 1; 1980, p. 279–281. (In Russian)
Yeznik Koghbatsi, 5th century	Yeznik K. Refutation of the sects. Translated from Old Armenian (Grabar) and commented by A. A. Abrahamyan. YSU Publishing House, Yerevan; 1994. (In Armenian)
Zhukovskiy, 1982	Zhukovskiy PM. Fam. Cannabiaceae. Bot. 5th edn, Kolos, Moscow; 1982, p. 430-431. (In Russian).
Boyajyan, 2013	Boyajyan A. The factors that have their influence on the development of plant-growing in the province of Aleksandrapol at the end of the 19th and in the beginning of 20th centuries. Shirak Centre of Armenological Studies of NAS RA․ Scientific works, 16; 2013, 80–87. (In Armenian). https://arar.sci.am/dlibra/publication/217085/edition/197746/content (26 October 2024, date last accessed)
Vardanyan, 2004	Vardanyan, A. V. Interdialect of Vayots dzor. Tigran Mets Publ., Yerevan; 2004, 509 pp. (In Armenian) https://language.sci.am/sites/default/files/book/vardanyan_vayots_dzor.pdf.pdf (28 October 2024, date last accessed)
Alishan, 1895	Alishan Gh. Haybusak or Armenian Botany. Venice, Sant Lazzaro; 1895, 697 pp. (In Armenian). https://books.google.am/books?id=p6glAQAAMAAJ&amp;printsec=frontcover&amp;hl=ru&amp;source=gbs_ge_summ ary_r&amp;cad=0#v=onepage&amp;q&amp;f=false (29 October 2024, date last accessed)
